# Supplementary material
Source: PubMed Central journal article supplement (PMC3433253)
Supplement: NIHMS398406-supplement-Fig_S1-7.pdf [file NIHMS398406-supplement-Fig_S1-7.pdf]

## Supplemental Figures

## CC2D1A is a regulator of ESCRT-III CHMP4B

Nicolas Martinelli<sup>1,4</sup>, Bettina Hartlieb<sup>1,4</sup>, Yoshiko Usami<sup>2</sup>, Charles Sabin<sup>1</sup>, Aurelien Dordor<sup>1</sup>,  
 Nolwenn Miguët<sup>1</sup>, Sergiy V. Avilov<sup>1,3</sup>, Euripedes A. Ribeiro Jr<sup>1</sup>, Heinrich Göttlinger<sup>2</sup> and  
 Winfried Weissenhorn<sup>1,5</sup>

<sup>1</sup>Unit of Virus Host Cell Interactions (UVHCI) UMI 3265 Université Joseph Fourier-EMBL-CNRS, 6 rue Jules Horowitz, 38042 Grenoble Cedex 9, France

<sup>2</sup>Program in Gene Function and Expression, Program in Molecular Medicine, University of Massachusetts Medical School, Worcester, MA 01605, USA

<sup>3</sup>European Molecular Biology Laboratory, Grenoble Outstation, 6 rue Jules Horowitz, BP181, 38042 Grenoble Cedex 9, France

<sup>4</sup>These authors contributed equally

<sup>5</sup>Corresponding author: Winfried Weissenhorn, e-mail: [weissenhorn@embl.fr](mailto:weissenhorn@embl.fr)

Tel: 33-476-207281 Fax: 33-476-209400

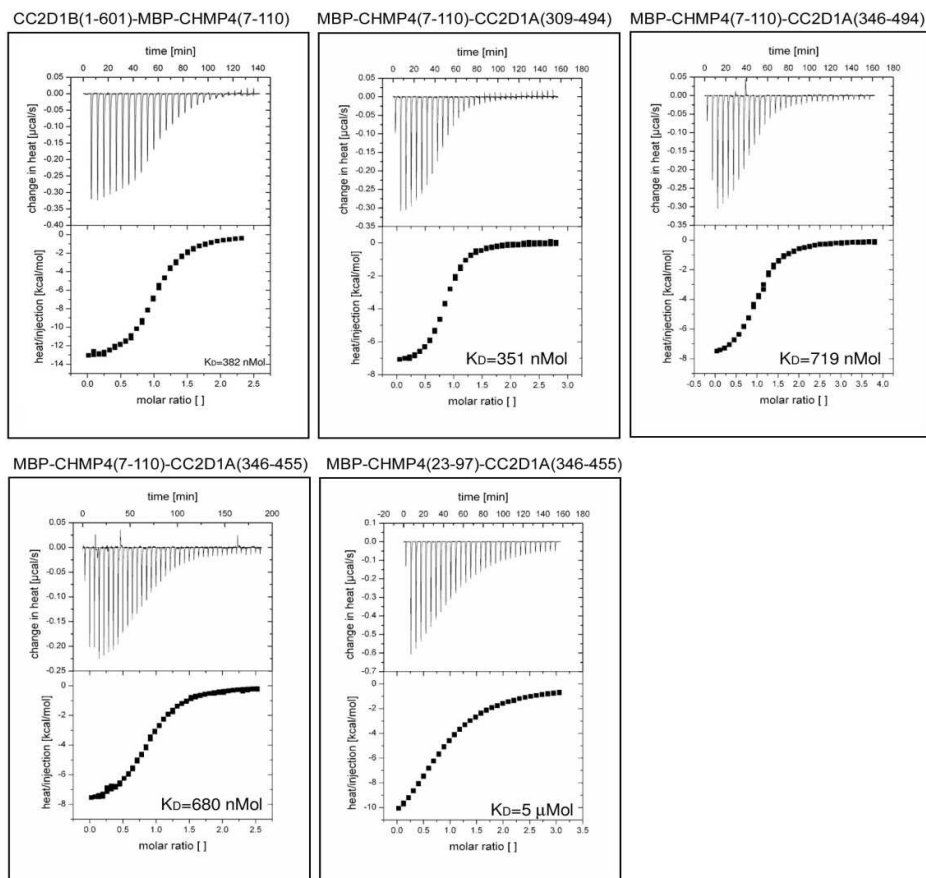

**Figure S1.** Isothermal titration calorimetry of MBP-CHMP4B(7-110) and MBP-CHMP4B(23-97) and CC2D1B and CC2D1A constructs as indicated. Details of the measurement are listed in table 1.

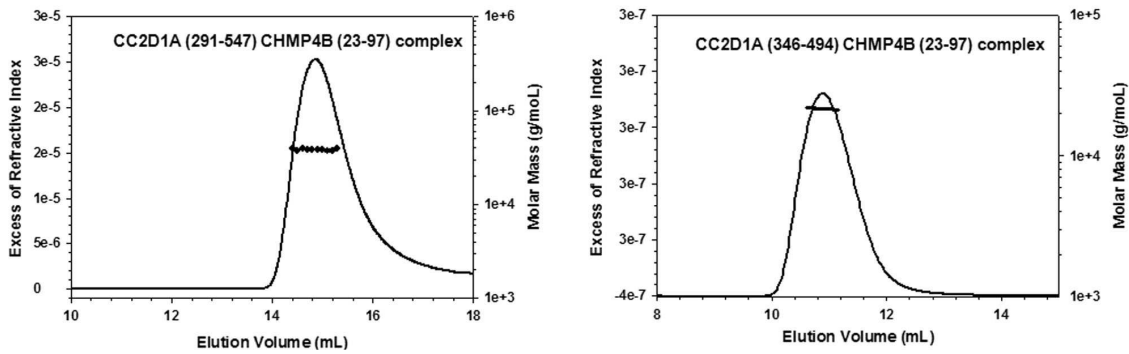

**Figure S2.** SEC (S-200 column, left panel and S-75 column, right panel) in combination with RI (refractive index) and MALLS (Multi Angle Laser Light Scattering) analyses reveal 1:1 complexes for CC2D1A(291-547)-CHMP4B(23-97) (left panel) and CC2D1A(346-494)-CHMP4B(23-97) (right panel). The molecular weight of a 1:1 complex of CC2D1A(291-547)-CHMP4B(23-97) derived from MALLS is 38 kDa compared to the calculated molecular weight of 41.7 kDa. The MALLS derived molecular weight of a 1:1 complex of CC2D1A(346-494)-CHMP4B(23-97) is 21.5 kDa compared to the calculated molecular weight of 25.5 kDa.

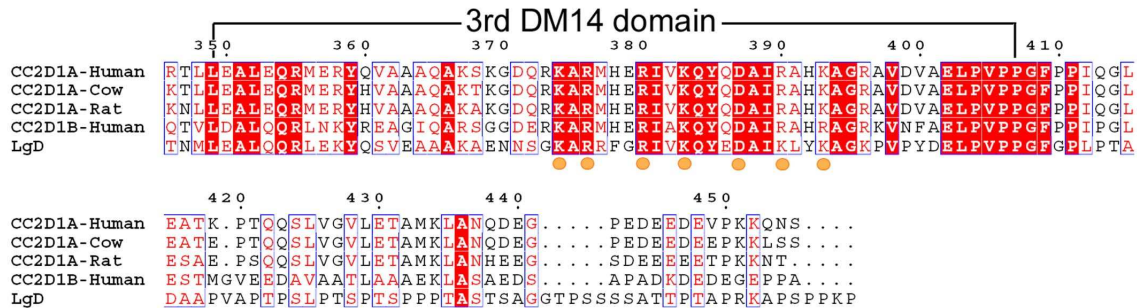

**Figure S3.** Sequence alignment of residues 346 to 454 of human CC2D1A (NP\_060191.3) with human CC2D1B (CAI12284.1), cow CC2D1A (NP\_001092424.1), rat CC2D1A (NP\_001013891.1) and drosophila Lgd (NP\_609488.1). Because all isoforms bind CHMP4B, strictly conserved residues were chosen for mutagenesis as indicated by orange dots; K374, R376, R380, K383, D387, R390 and K394. The prediction of the 3rd DM14 domain is outlined.

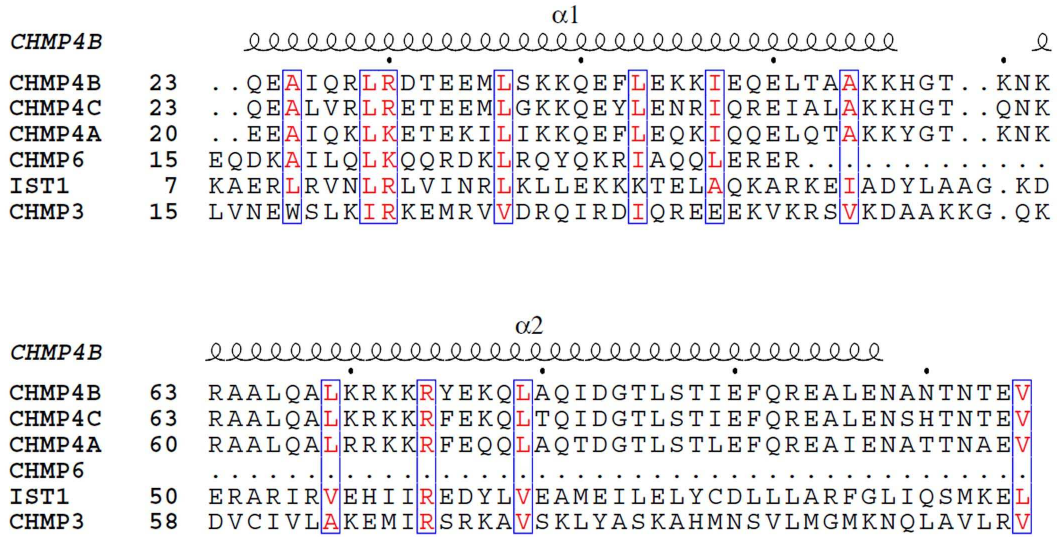

**Figure S4.** Structure based sequence alignment of CHMP4A, B, C, CHMP6, CHMP3 and IST1 regions comprising  $\alpha$  helices 1 and 2.

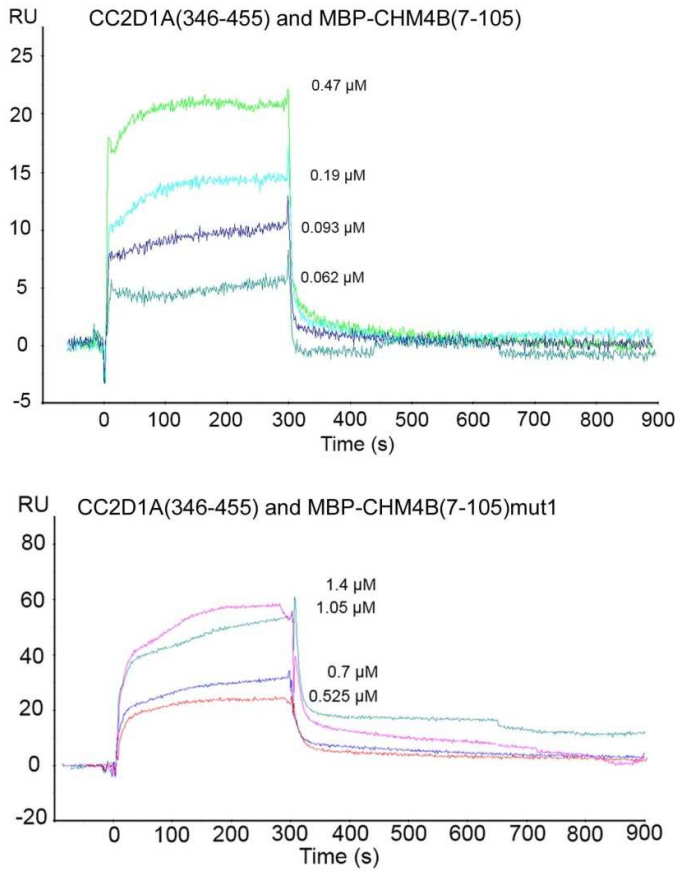

**Figure S5.** SPR analyses of CC2D1A(346-455) binding to MBP-CHMP4B(7-105) wild type (upper panel) and MBP-CHMP4B(7-105)<sub>mut1</sub> (lower panel).

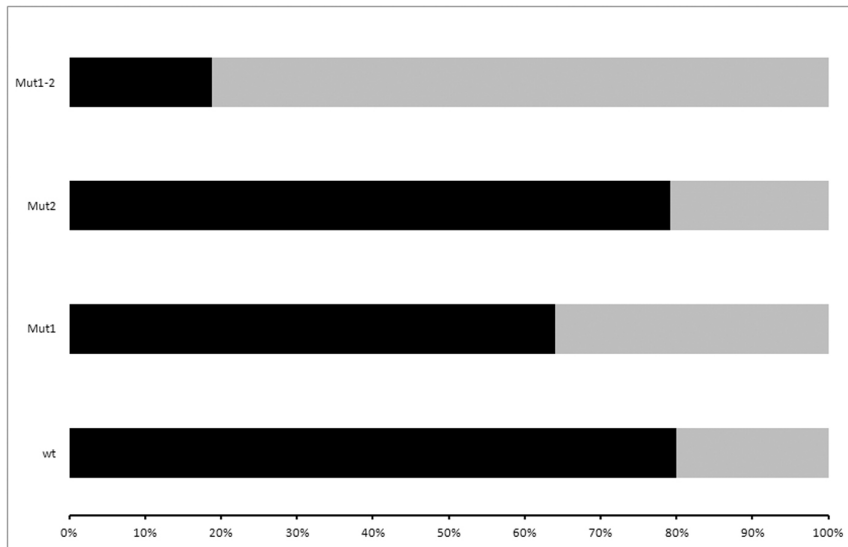

**Figure S6.** Quantification of the IF images representing cells expressing CHMP4B(1-153)-flag and the mutants mut1, mut2 and mut1.2 as shown in figures 6a-d. Cells were classified based on CHMP4B distribution in the cytoplasm; 24 to 50 cells/condition were examined. Black bars, percentage of cells with CHMP4B plasma membrane association; grey bars, percentage of cells with CHMP4B uniformly distributed in the cytoplasm.

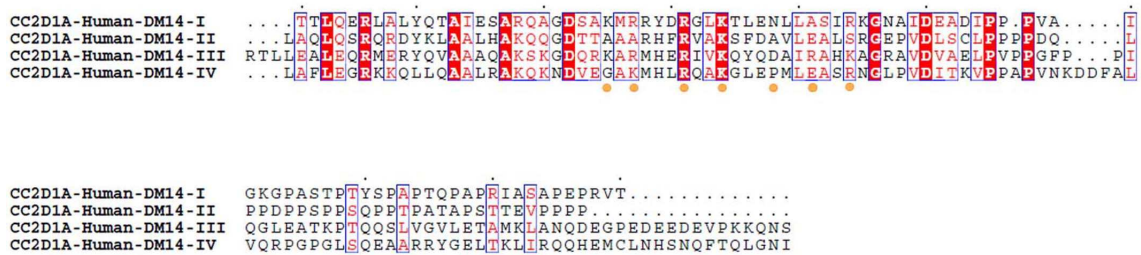

**Figure S7.** Sequence alignment of all four human CC2D1A DM14 domains. The amino acids changed within the third DM14 domain that affect CHMP4B binding are labeled by orange dots.
